# Supplementary material
Source: PubMed Central journal article supplement (PMC6537619)
Supplement: jgv-99-1494-s001.pdf [file jgv-99-1494-s001.pdf]

1 **Table S1.** Crystallographic data, structure solution and refinement statistics.

|                                                                                      | Derivative                                | Native 1                                     | Native 2                                  | GlcNAc-soaked                                   |
|--------------------------------------------------------------------------------------|-------------------------------------------|----------------------------------------------|-------------------------------------------|-------------------------------------------------|
| <i>Data</i>                                                                          |                                           |                                              |                                           |                                                 |
| Synchrotron beamline                                                                 | ALBA BL13-Xaloc                           | ALBA BL13-Xaloc                              | ESRF ID29                                 | ESRF ID23-2                                     |
| Data collection date                                                                 | 31 January 2014                           | 31 January 2014                              | 21 February 2014                          | 31 October 2014                                 |
| Detector                                                                             | Dectris Pilatus 6M                        | Dectris Pilatus 6M                           | ADSC Quantum 315r                         | MAR Mosaic 225                                  |
| Spacegroup                                                                           | $C222_1$                                  | $P2_1$                                       | $P2_12_12_1$                              | $I2_13$                                         |
| Cell parameters a, b, c (Å)                                                          | 92.1, 164.3, 96.4                         | 93.88, 100.60, 95.47                         | 55.87, 91.11, 128.92                      | 163.41, 163.41, 163.41                          |
| Cell angles $\alpha$ , $\beta$ , $\gamma$ (°)                                        | 90.0, 90.0, 90.0                          | 90.00, 116.28, 90.00                         | 90.00, 90.00, 90.00                       | 90.00, 90.00, 90.00                             |
| Wavelength (Å)                                                                       | 1.0024                                    | 1.0023                                       | 0.9763                                    | 0.8729                                          |
| Average mosaicity (°)                                                                | 0.14                                      | 0.48                                         | 0.27                                      | 0.41                                            |
| Resolution (Å)                                                                       | 96.4-2.76 (3.02-2.76)                     | 29.7-1.80 (1.83-1.80)                        | 34.1-1.70 (1.74-1.70)                     | 28.9-2.00 (2.05-2.00)                           |
| Observed reflections                                                                 | 19199 (4473)                              | 144435 (7096)                                | 68912 (3722)                              | 48930 (3642)                                    |
| Completeness                                                                         | 0.997 (0.988)                             | 0.982 (0.978)                                | 0.943 (0.696)                             | 1.000 (1.000)                                   |
| Multiplicity                                                                         | 11.7 (8.0)                                | 2.8 (2.9)                                    | 3.5 (1.9)                                 | 7.9 (7.8)                                       |
| Rmerge                                                                               | 0.104 (0.589)                             | 0.078 (0.334)                                | 0.116 (0.233)                             | 0.101 (0.404)                                   |
| I/sigma(I)                                                                           | 19.6 (3.2)                                | 7.1 (2.5)                                    | 6.3 (2.1)                                 | 13.2 (4.8)                                      |
| CC1/2                                                                                | 0.998 (0.867)                             | 0.989 (0.857)                                | 0.983 (0.857)                             | 0.998 (0.714)                                   |
| Wilson B (Å <sup>2</sup> )                                                           | 71.3                                      | 16.5                                         | 14.5                                      | 20.0                                            |
| <i>Phasing</i>                                                                       |                                           |                                              |                                           |                                                 |
| Number of heavy atoms                                                                | 12 Hg                                     | -                                            | -                                         | -                                               |
| Correlation coefficient                                                              | 0.462                                     | -                                            | -                                         | -                                               |
| Anomalous phasing power                                                              | 0.753                                     | -                                            | -                                         | -                                               |
| Figure of merit                                                                      | 0.250                                     | -                                            | -                                         | -                                               |
| Solvent flattening (solvent fraction)                                                | 0.539                                     | -                                            | -                                         | -                                               |
| Hand score (original / inverted)                                                     | 0.2471 / 0.1310                           | -                                            | -                                         | -                                               |
| Correlation on $ E ^2$ / contrast                                                    | 2.5866                                    | -                                            | -                                         | -                                               |
| <i>Refinement</i>                                                                    |                                           |                                              |                                           |                                                 |
| Resolution                                                                           | 82.1-2.76 (2.83-2.76)                     | 29.7-1.80 (1.90-1.80)                        | 34.1-1.70 (1.82-1.70)                     | 28.0-2.00 (2.05-2.00)                           |
| Reflections used                                                                     | 18197 (1269)                              | 140696 (20353)                               | 65280 (9409)                              | 46439 (3444)                                    |
| Reflections used for Rfree                                                           | 985 (69)                                  | 3644 (499)                                   | 3559 (540)                                | 2409 (165)                                      |
| R-factor                                                                             | 0.203 (0.327)                             | 0.168 (0.232)                                | 0.172 (0.257)                             | 0.165 (0.269)                                   |
| Rfree                                                                                | 0.248 (0.377)                             | 0.201 (0.253)                                | 0.216 (0.266)                             | 0.205 (0.294)                                   |
| No. of atoms (total / protein / Hg / water / chloride / glycerol / sulfate / GlcNAc) | 4578 / 4529 / 5 / 44 / 0 / 0 / 0 / 0      | 10928 / 9213 / 0 / 1664 / 8 / 42 / 0 / 0     | 5285 / 4607 / 0 / 672 / 0 / 6 / 0 / 0     | 5036 / 4580 / 0 / 350 / 0 / 6 / 55 / 45         |
| Average B (overall / protein / Hg / water / chloride / glycerol / sulfate / GlcNAc)  | 62.4 / 62.6 / 70.0 / 41.6 / - / - / - / - | 25.7 / 23.7 / - / 36.8 / 33.3 / 37.0 / - / - | 21.1 / 19.8 / - / 30.1 / - / 48.1 / - / - | 29.9 / 29.1 / - / 36.7 / - / 40.1 / 44.4 / 30.2 |
| Ramachandran (favored / allowed)                                                     | 0.929 / 0.990                             | 0.968 / 1.000                                | 0.976 / 1.000                             | 0.971 / 0.998                                   |
| R.m.s.d. bonds (Å) / angles (°)                                                      | 0.009 / 1.5                               | 0.013 / 1.6                                  | 0.012 / 1.5                               | 0.010 / 1.4                                     |
| PDB code                                                                             | 5N83                                      | 5N8D                                         | 5NBH                                      | 5NC1                                            |

2 Values in parentheses are for the highest resolution bin

3

4 **Table S2.** Abbreviations, names, print concentrations and primary structures of the glycans used in  
5 the microarray.

| Abbreviation  | Neoglycoconjugate/ glycoprotein                     | Print conc (mg/mL) | Structure                                                                                                                                                          |
|---------------|-----------------------------------------------------|--------------------|--------------------------------------------------------------------------------------------------------------------------------------------------------------------|
| 1 Fetuin      | Fetuin                                              | 1                  | Bovine fetuin                                                                                                                                                      |
| 2 Ov          | Ovalbumin                                           | 1                  | Hen ovalbumin                                                                                                                                                      |
| 3 4APHSA      | 4AP-HSA                                             | 1                  | 4AP-HSA, linker alone attached to HSA                                                                                                                              |
| 4 a-C         | $\alpha$ -Crystallin from bovine lens               | 1                  | $\alpha$ -Crystallin from bovine lens, A and B subunits                                                                                                            |
| 5 M3BSA       | Man $\alpha$ 1,3(Man $\alpha$ 1,6)Man-BSA           | 1                  | Man $\alpha$ -(1,3)-[Man $\alpha$ -(1,6)]-Man-BSA                                                                                                                  |
| 6 GlcNAcBSA   | GlcNAc-BSA                                          | 1                  | GlcNAc-Sp14-NH2(Lys)-BSA                                                                                                                                           |
| 7 3SLacHSA    | 3'-Sialyllactose-APD-HSA                            | 1                  | Neu5Ac $\alpha$ -(2,3)-Gal- $\beta$ -(1,4)-Glc-APD-HSA                                                                                                             |
| 8 6SLacHSA    | 6'-Sialyllactose-APD-HSA                            | 1                  | Neu5Ac $\alpha$ -(2,6)-Gal- $\beta$ -(1,4)-Glc-APD-HSA                                                                                                             |
| 9 H2BSA       | H Type II-APE-BSA                                   | 1                  | Fuc $\alpha$ -(1,2)-Gal- $\beta$ -(1,4)-GlcNAc- $\beta$ -APE-BSA                                                                                                   |
| 10 GGGNHSA    | Gal $\alpha$ 1,3Gal $\beta$ 1,4GlcNAc-HSA           | 1                  | Gal $\alpha$ -(1,3)-Gal- $\beta$ -(1,4)-GlcNAc-HSA                                                                                                                 |
| 11 Ga3GBSA    | Gal $\alpha$ 1,3Gal-BSA                             | 1                  | Gal $\alpha$ -(1,3)-Gal-Sp3-BSA                                                                                                                                    |
| 12 4APBSA     | 4AP-BSA                                             | 1                  | 4AP-BSA, linker alone attached to BSA                                                                                                                              |
| 13 LNFP1BSA   | Lacto-N-fucopentaose I-BSA                          | 1                  | Fuc $\alpha$ -(1,2)-Gal- $\beta$ -(1,3)-GlcNAc- $\beta$ -(1,3)-Gal- $\beta$ -(1,4)-Glc-BSA                                                                         |
| 14 LebBSA     | LNDI-BSA/ Lewis b-BSA                               | 1                  | Fuc $\alpha$ -(1,2)-Gal- $\beta$ -(1,3)-[Fuc $\alpha$ -(1,4)]GlcNAc- $\beta$ -(1,3)-Gal- $\beta$ -(1,4)-Glc-APD-BSA                                                |
| 15 LexBSA     | Lewis x-BSA                                         | 1                  | Gal- $\beta$ -(1,4)-[Fuc $\alpha$ -(1,3)]GlcNAc-BSA                                                                                                                |
| 16 3LexHSA    | Tri-Lex-APE-HSA                                     | 1                  | Gal- $\beta$ -(1,4)-[Fuc $\alpha$ -(1,3)]GlcNAc- $\beta$ -(1,3)-Gal- $\beta$ -(1,4)-[Fuc $\alpha$ -(1,3)]GlcNAc- $\beta$ -O-APE-HSA                                |
| 17 6SuLeaBSA  | 6-Sulfo Lewis a-BSA                                 | 1                  | (SO4)6Gal- $\beta$ -(1,3)-[Fuc $\alpha$ -(1,4)]GlcNAc-Sp3-BSA                                                                                                      |
| 18 LeyHSA     | Lewis y-tetrasaccharide-APE-HSA                     | 1                  | Fuc $\alpha$ -(1,2)-Gal- $\beta$ -(1,4)-[Fuc $\alpha$ -(1,3)]GlcNAc- $\beta$ -O-APE-HSA                                                                            |
| 19 LNTHSA     | Lacto-N-tetraose-APD-HSA                            | 1                  | Gal- $\beta$ -(1,3)-GlcNAc- $\beta$ -(1,3)-Gal- $\beta$ -(1,4)-Glc-APD-HSA                                                                                         |
| 20 GlobNTHSA  | Globo-N-tetraose-APD-HSA                            | 1                  | GalNAc- $\beta$ -(1,3)-Gal- $\alpha$ -(1,4)-Gal- $\beta$ -(1,4)-Glc-APD-HSA                                                                                        |
| 21 GlobTHSA   | Globotriose-APE-HSA                                 | 1                  | Gal $\alpha$ -(1,4)-Gal- $\beta$ -(1,4)-Glc- $\beta$ -APE-HSA                                                                                                      |
| 22 ASF        | Asialofetuin                                        | 1                  | Bovine asialofetuin                                                                                                                                                |
| 23 PBS        | PBS                                                 | -                  | Phosphate buffered saline                                                                                                                                          |
| 24 RB         | RNase B                                             | 1                  | Ribonuclease B                                                                                                                                                     |
| 25 Xferrin    | Transferrin                                         | 1                  | Bovine transferrin                                                                                                                                                 |
| 26 LacNAcBSA  | LacNAc-BSA                                          | 1                  | Gal- $\beta$ -(1,4)-GlcNAc-Sp3-BSA                                                                                                                                 |
| 27 3SLNBSA    | 3'SialylLacNAc-BSA                                  | 1                  | Neu5Ac $\alpha$ -(2,3)-Gal- $\beta$ -(1,4)-GlcNAc-BSA                                                                                                              |
| 28 2FLBSA     | 2'Fucosyllactose-BSA                                | 1                  | Fuc $\alpha$ -(1,2)-Gal- $\beta$ -(1,4)-Glc-Sp3-BSA                                                                                                                |
| 29 3SFLBSA    | 3'Sialyl-3-fucosyllactose-BSA                       | 1                  | Neu5Ac $\alpha$ -(2,3)-Gal- $\beta$ -(1,4)-[Fuc $\alpha$ -(1,3)]Glc-Sp3-BSA                                                                                        |
| 30 BGABSA     | Blood Group A-BSA                                   | 1                  | GalNAc $\alpha$ -(1,3)-[Fuc $\alpha$ -(1,2)]Gal- $\beta$ -(1,4)-GlcNAc-Sp6-BSA                                                                                     |
| 31 BGBHSA     | Blood Group B-BSA                                   | 1                  | Gal $\alpha$ -(1,3)-[Fuc $\alpha$ -(1,2)]Gal- $\beta$ -(1,4)-GlcNAc-Sp6-HSA                                                                                        |
| 32 Gb4GBSA    | Gal $\beta$ 1,4GalBSA                               | 1                  | Gal- $\beta$ -(1,4)-Gal-Sp3-BSA                                                                                                                                    |
| 33 Ga2GBSA    | Gal $\alpha$ 1,2GalBSA                              | 1                  | Gal $\alpha$ -(1,2)-Gal-Sp3-BSA                                                                                                                                    |
| 34 LNFP1IIBSA | Lacto-N-fucopentaose II-BSA                         | 1                  | Fuc $\alpha$ -(1,3)-Gal- $\beta$ -(1,3)-GlcNAc- $\beta$ -(1,3)-Gal- $\beta$ -(1,4)-Glc-BSA                                                                         |
| 35 LNFP1IIBSA | Lacto-N-fucopentaose III-BSA                        | 1                  | Gal- $\beta$ -(1,4)-[Fuc $\alpha$ -(1,3)]GlcNAc- $\beta$ -(1,3)-Gal- $\beta$ -(1,4)-Glc-BSA                                                                        |
| 36 LNDHBSA    | Lacto-N-difucotetraose I-BSA                        | 1                  | Fuc $\alpha$ -(1,2)-Gal- $\beta$ -(1,3)-[Fuc $\alpha$ -(1,4)]GlcNAc- $\beta$ -(1,3)-Gal- $\beta$ -(1,4)-Glc-Sp3-BSA                                                |
| 37 DiLexBSA   | Di-Lex-APE-BSA                                      | 1                  | Gal- $\beta$ -(1,4)-[Fuc $\alpha$ -(1,3)]GlcNAc- $\beta$ -(1,3)-Gal- $\beta$ -(1,4)-[Fuc $\alpha$ -(1,3)]GlcNAc- $\beta$ -O-APE-BSA                                |
| 38 DiLexHSA   | Di-Lewis-APE-HSA                                    | 1                  | Gal- $\beta$ -(1,4)-[Fuc $\alpha$ -(1,3)]GlcNAc- $\beta$ -(1,3)-Gal- $\beta$ -(1,4)-[Fuc $\alpha$ -(1,3)]GlcNAc- $\beta$ -O-APE-HSA                                |
| 39 3SLexBSA3  | 3'Sialyl Lewis x-BSA                                | 1                  | Neu5Ac $\alpha$ -(2,3)-Gal- $\beta$ -(1,4)-[Fuc $\alpha$ -(1,3)]GlcNAc-Sp3-BSA                                                                                     |
| 40 SLexBSA14  | 3'Sialyl Lewis x-BSA                                | 1                  | Neu5Ac $\alpha$ -(2,3)-Gal- $\beta$ -(1,4)-[Fuc $\alpha$ -(1,3)]GlcNAc-Sp14-BSA                                                                                    |
| 41 6SuLexBSA  | 6-Sulfo Lewis x-BSA                                 | 1                  | (SO4)6Gal- $\beta$ -(1,4)-[Fuc $\alpha$ -(1,3)]GlcNAc-Sp3-BSA                                                                                                      |
| 42 3SuLeaBSA  | 3-Sulfo Lewis a-BSA                                 | 1                  | (SO4)3Gal- $\beta$ 1-3-[Fuc $\alpha$ -(1,4)]GlcNAc-Sp3-BSA                                                                                                         |
| 43 3SuLexBSA  | 3-Sulfo Lewis x-BSA                                 | 1                  | (SO4)3Gal- $\beta$ 1-4-[Fuc $\alpha$ -(1,3)]GlcNAc-Sp3-BSA                                                                                                         |
| 44 DFPLNHSA   | Difucosyl-para-lacto-N-hexaose-APD-HSA, (Lea/Lex)   | 1                  | Gal- $\beta$ -(1,3)-[Fuc $\alpha$ -(1,4)]GlcNAc- $\beta$ -(1,3)-Gal- $\beta$ -(1,4)-[Fuc $\alpha$ -(1,3)]GlcNAc- $\beta$ -(1,3)-Gal- $\beta$ -(1,4)-Glc-APD-HSA    |
| 45 LeaBSA     | Lewis a-BSA                                         | 1                  | Gal- $\beta$ -(1,3)-[Fuc $\alpha$ -(1,4)]GlcNAc-Sp3-BSA                                                                                                            |
| 46 3FLexHSA   | Tri-fucosyl-Ley-heptasaccharide-APE-HSA             | 1                  | Fuc $\alpha$ -(1,2)-Gal- $\beta$ -(1,4)-[Fuc $\alpha$ -(1,3)]GlcNAc- $\beta$ -(1,3)-Gal- $\beta$ -(1,4)-[Fuc $\alpha$ -(1,3)]GlcNAc- $\beta$ -O-APE-HSA            |
| 47 LNnTHSA    | Lacto-N-neotetraose-APD-HSA                         | 1                  | Gal- $\beta$ -(1,4)-GlcNAc- $\beta$ -(1,3)-Gal- $\beta$ -(1,4)-Glc-APD-HSA                                                                                         |
| 48 SLNFVHSA   | Sialyl-LNF V-APD-HSA                                | 1                  | Fuc $\alpha$ -(1,2)-Gal- $\beta$ -(1,3)-[NeuAc $\alpha$ -(2,6)]GlcNAc- $\beta$ -(1,3)-Gal- $\beta$ -(1,4)-Glc-APD-HSA                                              |
| 49 MMLNnHSA   | Monofucosyl, monosialyllactose-N-neohexaose-APD-HSA | 1                  | Neu5Ac $\alpha$ -(2,3)-Gal- $\beta$ -(1,4)-GlcNAc- $\beta$ -(1,3)-[Gal- $\beta$ -(1,4)-[Fuc $\alpha$ -(1,3)]GlcNAc- $\beta$ -(1,6)]Gal- $\beta$ -(1,4)-Glc-APD-HSA |
| 50 SLNnTHSA   | Sialyl-LNnT-penta-APD-HSA                           | 1                  | Neu5Ac $\alpha$ -(2,3)-Gal- $\beta$ -(1,4)-GlcNAc- $\beta$ -(1,3)-Gal- $\beta$ -(1,4)-Glc-APD-HSA                                                                  |
| 51 GM1HSA     | GM1-pentasaccharide-APD-HSA                         | 1                  | Gal- $\beta$ -(1,3)-GalNAc- $\beta$ -(1,4)-[Neu5Ac $\alpha$ -(2,3)]Gal- $\beta$ -(1,4)-Glc-APD-HSA                                                                 |
| 52 aGM1HSA    | Asialo-GM1-tetrasaccharide-APD-HSA                  | 1                  | Gal- $\beta$ -(1,3)-GalNAc- $\beta$ -(1,4)-Gal- $\beta$ -(1,4)-Glc-APD-HSA                                                                                         |
| 53 Inv        | Invertase                                           | 1                  | Yeast invertase, grade VII                                                                                                                                         |
| 54 Fibrin     | Fibrinogen                                          | 0,5                | Fibrinogen from human plasma                                                                                                                                       |
| 55 A1AT       | alpha-1-antitrypsin                                 | 1                  | alpha-1-antitrypsin                                                                                                                                                |
| 56 Cerulo     | Ceruloplasmin                                       | 1                  | Ceruloplasmin, human, type III                                                                                                                                     |

Linker key  
Sp3 = 3 atom spacer  
Sp6 = 6 atom spacer  
Sp14 = 14 atom linker  
4AP = 4-aminophenyl  
APE = aminophenylethyl  
APD = acetylphenylenediamine

8 **Table S3.** List of gastrointestinal tract mucins and glycoproteins printed and printing conditions for  
9 the gastrointestinal tract mucin microarray.

| Number | Source                             | Print concentration (mg/mL) | Print buffer        |
|--------|------------------------------------|-----------------------------|---------------------|
| 1      | Equine stomach                     | 0.25                        | PBS 0.01% Tween 20  |
| 2      | Ovine abomasum antrum              | 0.1                         | PBS 0.01% Tween 20  |
| 3      | HT29MTXE12                         | 0.5                         | PBS 0.025% Tween 20 |
| 4      | Ovine descending colon             | 0.15                        | PBS 0.01% Tween 20  |
| 5      | Ovine ileum                        | 0.15                        | PBS 0.01% Tween 20  |
| 6      | Ovine spiral colon                 | 0.5                         | PBS                 |
| 7      | Chicken proximal small intestine   | 0.25                        | PBS 0.025% Tween 20 |
| 8      | Ovine jejunum                      | 0.5                         | PBS 0.01% Tween 20  |
| 9      | Ovine duodenum                     | 0.15                        | PBS 0.01% Tween 20  |
| 10     | Porcine gastric mucin              | 0.33                        | PBS 0.01% Tween 20  |
| 11     | Chicken large intestine            | 0.2                         | PBS 0.01% Tween 20  |
| 12     | Equine duodenum                    | 0.3                         | PBS 0.01% Tween 20  |
| 13     | Deer jejunum                       | 0.25                        | PBS 0.025% Tween 20 |
| 14     | Deer spiral ascending colon        | 0.75                        | PBS 0.025% Tween 20 |
| 15     | Bovine abomasum                    | 0.25                        | PBS 0.01% Tween 20  |
| 16     | Bovine duodenum                    | 0.5                         | PBS 0.01% Tween 20  |
| 17     | Equine small intestine             | 0.25                        | PBS                 |
| 18     | Equine left ventral colon          | 0.25                        | PBS 0.01% Tween 20  |
| 19     | Bovine spiral colon                | 0.25                        | PBS 0.01% Tween 20  |
| 20     | Deer duodenum                      | 0.5                         | PBS 0.025% Tween 20 |
| 21     | Equine right ventral colon         | 0.15                        | PBS 0.01% Tween 20  |
| 22     | Equine dorsal colon                | 0.25                        | PBS 0.01% Tween 20  |
| 23     | Deer abomasum                      | 0.25                        | PBS 0.01% Tween 20  |
| 24     | Chicken cecum                      | 0.5                         | PBS 0.025% Tween 20 |
| 25     | LS174T                             | 0.5                         | PBS 0.01% Tween 20  |
| 26     | Porcine descending colon           | 0.5                         | PBS 0.025% Tween 20 |
| 27     | Porcine jejunum                    | 0.25                        | PBS                 |
| 28     | Porcine spiral colon               | 0.6                         | PBS 0.025% Tween 20 |
| 29     | Porcine stomach                    | 0.5                         | PBS 0.025% Tween 20 |
| 30     | Porcine ceca                       | 0.5                         | PBS 0.025% Tween 20 |
| 31     | Mouse large intestine              | 0.4                         | PBS 0.025% Tween 20 |
| 32     | Mouse cecum                        | 0.3                         | PBS 0.025% Tween 20 |
| 33     | Mouse stomach                      | 0.5                         | PBS 0.025% Tween 20 |
| 34     | Mouse small intestine              | 0.25                        | PBS 0.025% Tween 20 |
| 35     | Rat ileum                          | 0.5                         | PBS 0.025% Tween 20 |
| 36     | Rat duodenum and jejunum           | 0.5                         | PBS 0.025% Tween 20 |
| 37     | Rat cecum                          | 0.5                         | PBS 0.025% Tween 20 |
| 38     | Rat stomach                        | 0.5                         | PBS 0.025% Tween 20 |
| 39     | PBS                                |                             |                     |
| 40     | Asialofetuin                       | 1                           | PBS 0.05% Tween 20  |
| 41     | RNase B                            | 1                           | PBS 0.05% Tween 20  |
| 42     | Fetuin                             | 1                           | PBS 0.05% Tween 20  |
| 43     | Transferrin                        | 1                           | PBS 0.05% Tween 20  |
| 44     | Ovomucoid                          | 0.5                         | PBS 0.05% Tween 20  |
| 45     | Human $\alpha$ 1-acid glycoprotein | 1                           | PBS 0.05% Tween 20  |
| 46     | PBS 0.025% Tween 20                |                             |                     |

10

11

12 **Table S4.** Inhibition percentage of binding in the presence of 100 mM GlcNAc. Ten percent  
 13 inhibition or greater is highlighted by shaded cells.  
 14

| <b>Binding probe</b>                   | <b>MAdV-<br/>2fib(517-787)</b> | <b>MAdV-<br/>2fib(586-787)</b> | <b>WGA</b> |
|----------------------------------------|--------------------------------|--------------------------------|------------|
| Equine stomach mucin                   | 0.0                            | 23                             | 86         |
| Ovine abomasum antrum mucin            | 1.8                            | 19                             | 93         |
| HT29MTXE12 mucin                       | 39.4                           | 44                             | 63         |
| Ovine descending colon mucin           | 41.9                           | 61                             | 83         |
| Ovine ileum mucin                      | 19.2                           | 34                             | 55         |
| Ovine spiral colon mucin               | 43.2                           | 64                             | 45         |
| Chicken proximal small intestine mucin | 83.9                           | 85                             | 0          |
| Ovine jejunum mucin                    | 10.8                           | 48                             | 66         |
| Ovine duodenum mucin                   | 60.0                           | 75                             | 22         |
| Porcine gastric mucin                  | 37.7                           | 79                             | 0          |
| Chicken large intestine mucin          | 43.9                           | 65                             | 0          |
| Equine duodenum mucin                  | 43.1                           | 75                             | 67         |
| Deer jejunum mucin                     | 0.0                            | 0                              | 0          |
| Deer spiral ascending colon mucin      | 0.0                            | 0                              | 55         |
| Bovine abomasum mucin                  | 9.4                            | 40                             | 90         |
| Bovine duodenum mucin                  | 40.4                           | 27                             | 64         |
| Equine small intestine mucin           | 62.4                           | 80                             | 88         |
| Equine left ventral colon mucin        | 52.1                           | 50                             | 90         |
| Bovine spiral colon mucin              | 0.0                            | 0                              | 0          |
| Deer duodenum mucin                    | 0.0                            | 29                             | 0          |
| Equine right ventral colon mucin       | 0.0                            | 3                              | 91         |
| Equine dorsal colon mucin              | 0.0                            | 7                              | 91         |
| Deer abomasum mucin                    | 100.0                          | 100                            | 0          |
| Chicken cecum mucin                    | 66.6                           | 99                             | 0          |
| LS174T mucin                           | 71.4                           | 83                             | 94         |
| Porcine descending colon mucin         | 76.8                           | 82                             | 54         |
| Porcine jejunum mucin                  | 0.0                            | 0                              | 0          |
| Porcine spiral colon mucin             | 69.7                           | 75                             | 90         |
| Porcine stomach mucin                  | 30.9                           | 59                             | 85         |
| Porcine cecum mucin                    | 37.2                           | 42                             | 0          |
| Mouse large intestine mucin            | 81.7                           | 84                             | 70         |
| Mouse cecum mucin                      | 94.0                           | 93                             | 95         |
| Mouse stomach mucin                    | 43.4                           | 76                             | 11         |
| Mouse small intestine mucin            | 85.5                           | 94                             | 78         |
| Rat ileum mucin                        | 72.7                           | 83                             | 18         |
| Rat duodenum & jejunum mucin           | 93.3                           | 95                             | 0          |
| Rat cecum mucin                        | 81.0                           | 69                             | 0          |
| Rat stomach mucin                      | 90.9                           | 85                             | 82         |
| Asialofetuin                           | 0.0                            | 43                             | 0          |
| RNase B                                | 95.2                           | 96                             | 49         |
| Fetuin                                 | 0.0                            | 37                             | 49         |
| Transferrin                            | 0.0                            | 0                              | 0          |
| Ovomucoid                              | 97.1                           | 96                             | 41         |
| Human $\alpha$ 1-acid glycoprotein     | 0.0                            | 16                             | 0          |

15

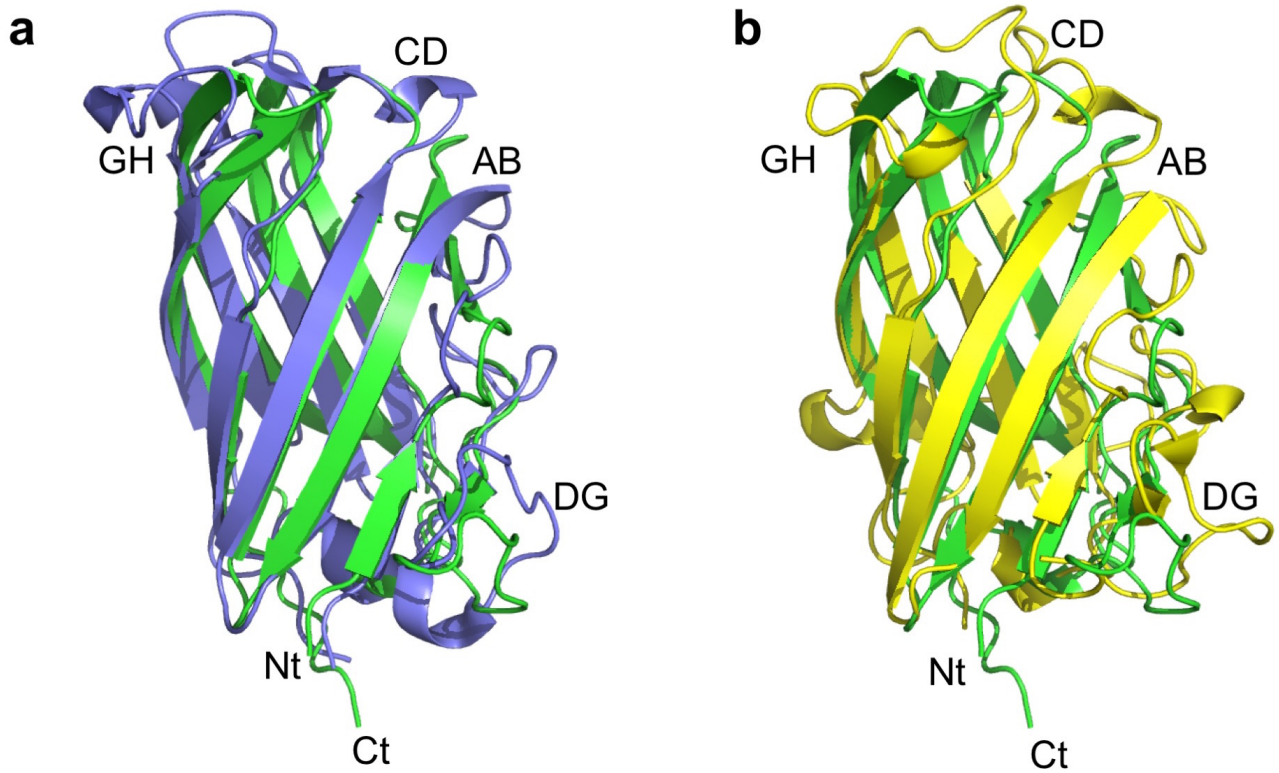

16  
 17 **Fig. S1.** Comparison of the MAdV-2, CAdV-2 and HAdV-5 fibre head structures. A. MAdV-2 fibre  
 18 head monomer (in green) superposed onto the CAdV-2 fibre head monomer (in blue). B. MAdV-2  
 19 fibre head monomer (in green) superposed onto the HAdV-5 fibre head monomer (in yellow). The  
 20 N-termini, C-termini and AB-, CD-, DG- and GH-loops are labelled.  
 21

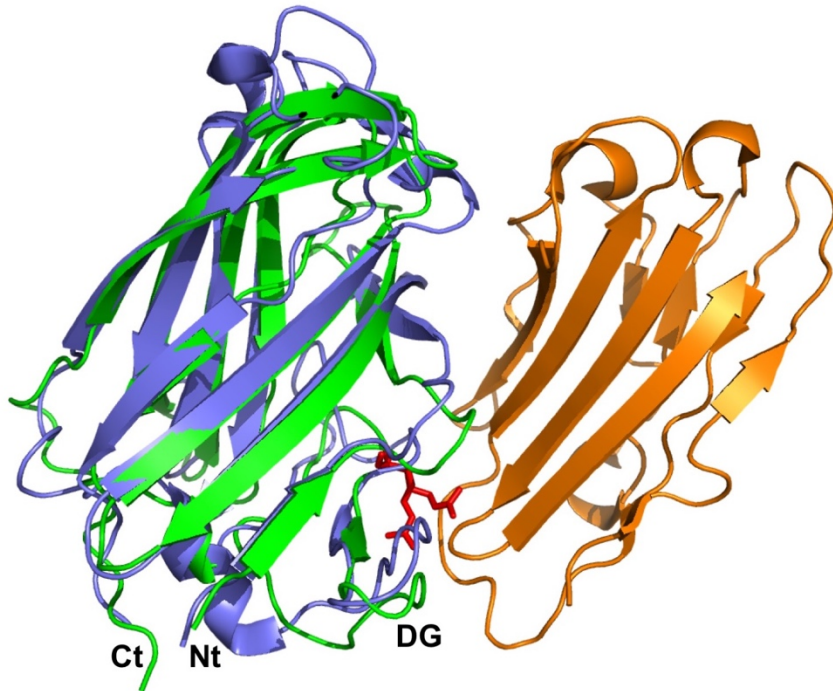

23

24 **b**

25

26

27

28

29

30

31

32

33

34

35

36

37

38

39

40

41

42

43

44

45

46

47

48

49

```

                ==AB==                =BC=                =CD==
MAdV-2  631  PVFVYQTPFNTPMRLRNNGTYNEY--ADAHIQVRFGTTVLFNIDVTGETNATGTQTWEL----- 687
CAdV-2  358  PPAAPITLWTGPGPSIINGFINDTFVIRCFICLTRDSNLVTVNASFVGGEGYRIVSPTQSQFSLIMEF 424
          * . * : . * ** * : .. * : * .. * . * .....* . . . . :
          :
          =====DG=====
MAdV-2  688  -----QFDGTLGSCLTGRMQVMGGTGEELDVTPTFILPTSDKSVYKQGFMPIV-C-----SENGEF 737
CAdV-2  425  DQFGQLMSTGNINSTTTWGEKPGWNNVQPRPSHTWKLCMPNREVYSTPAATISRCGLDSIAVDGAP 491
          *... * : *.. : : * : * .....* . * * : : *
          :
          =HI=                =IJ==
MAdV-2  738  KQ-----STYCSYALTYRLGNFYITLKSTTSGCKPIFQMSFMYESQIGIV 787
CAdV-2  492  SRSIDCMLIINKPKGVATYTLTFRFLNFN-RLSGGTLFKTDVLTFTYVGENQ---- 542
          .. : . : : * : * : * .. * . : : : : * . *

```

**Fig. S2.** MAdV-2 fibre head is unlikely to bind CAR. A. Monomer of the MAdV-2 fibre head (in green) superposed onto the CAdV-2 fibre head-CAR D1 complex (PDB entry 2J1K; CAdV-2 fibre head in blue, CAR D1 in orange). The DG-loop is labelled; Arg700 of the MAdV-2 fibre head structure is shown in red. N- and C-termini are also indicated. B. Alignment of the MAdV-2 fibre head sequence with the CAR-binding CAdV-2 fibre head sequence. Residues of the CAdV-2 fibre head which interact with CAR D1 domain are highlighted in yellow; Thr441 in green. Loops connecting different  $\beta$ -strands as observed in the MAdV-2 fibre head are labelled. Arg700 of the MAdV-2 fibre head is highlighted in red.

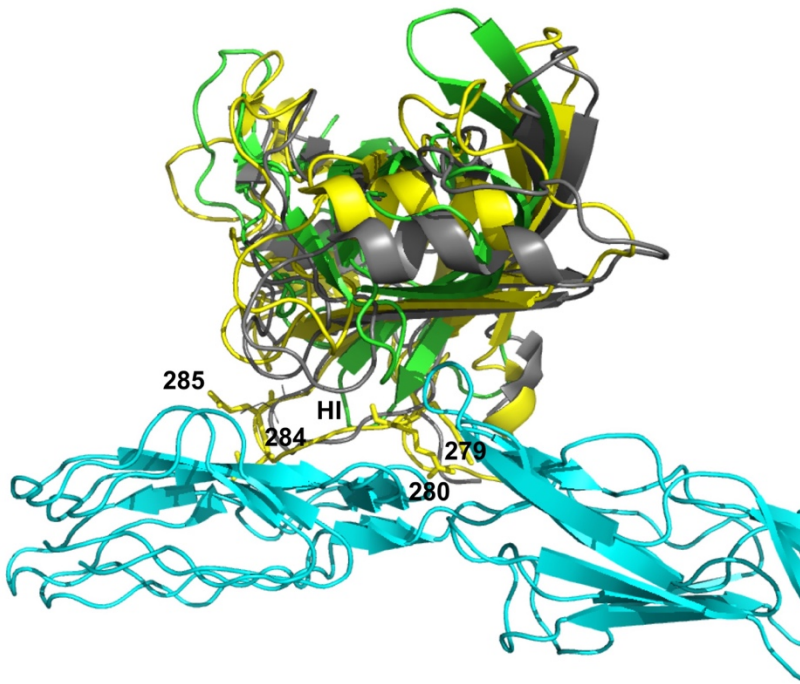

50  
51 **Fig. S3.** MAdV-2 fibre head is unlikely to bind CD46. Superposition of the MAdV-2 fibre head  
52 domain (in green) onto the HAdV-11 and HAdV21 fibre head domains bound to CD46 (HAdV11:  
53 PDB entry 3O8E, yellow; HAdV21: PDB entry 3I89; grey; CD46 in cyan). While the conformations  
54 of the HI-loops of HAdV-11 and HAdV-21 are similar to each other; the HI-loop of MAdV-2 is much  
55 shorter and apparently incompatible with CD46 binding. Arg279, Arg280, Asp284 and Glu285 of the  
56 HAdV-11 are shown and labelled.  
57

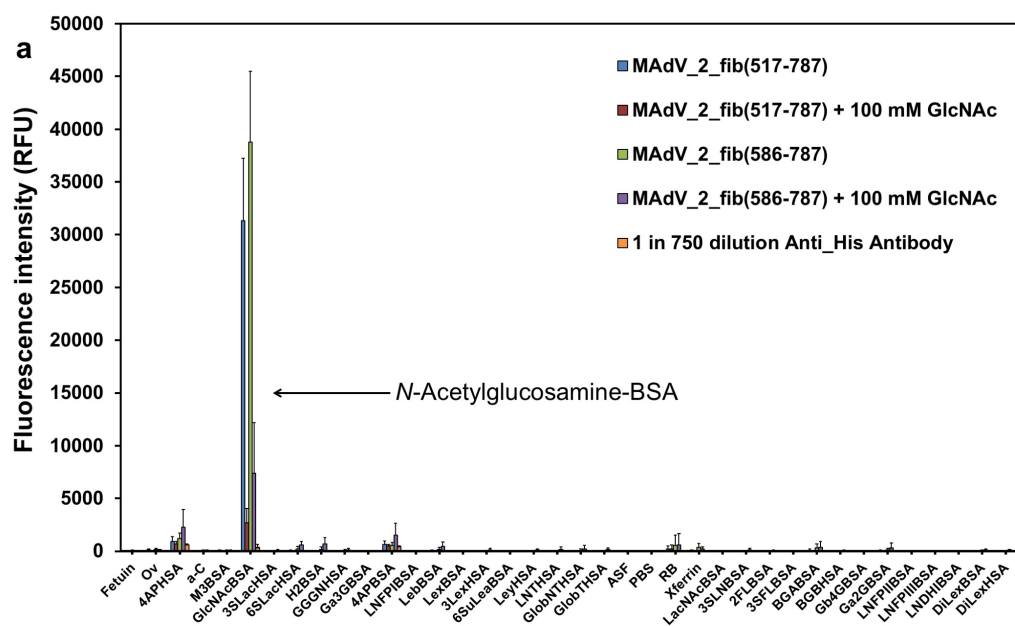

58

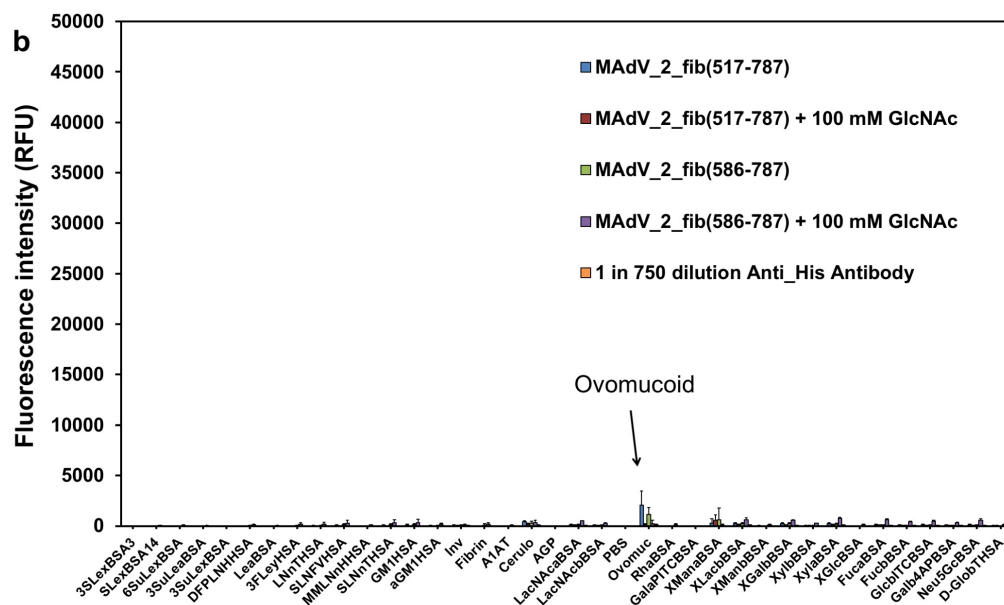

59

60 **Fig. S4.** Binding profile of two isoforms of MAdV-2 fiber protein. Bar chart (divided in panels A and  
 61 B) representing the binding intensity of the long (MAdV-2-fib(517-787)) and short (MAdV-2-  
 62 fib(586-787)) forms of the MAdV-2 fiber to carbohydrates on a microarray surface. Binding was  
 63 detected using a fluorescently labelled anti-His antibody. The data represents the average of four  
 64 replicate experiments and the error bars depict one standard deviation of the mean calculated over  
 65 four microarray slides. The protein isoforms show comparable binding patterns with strong binding  
 66 to GlcNAc-BSA and lower binding to ovomucoid, both of which were inhibited by co-incubation  
 67 with 100 mM GlcNAc.



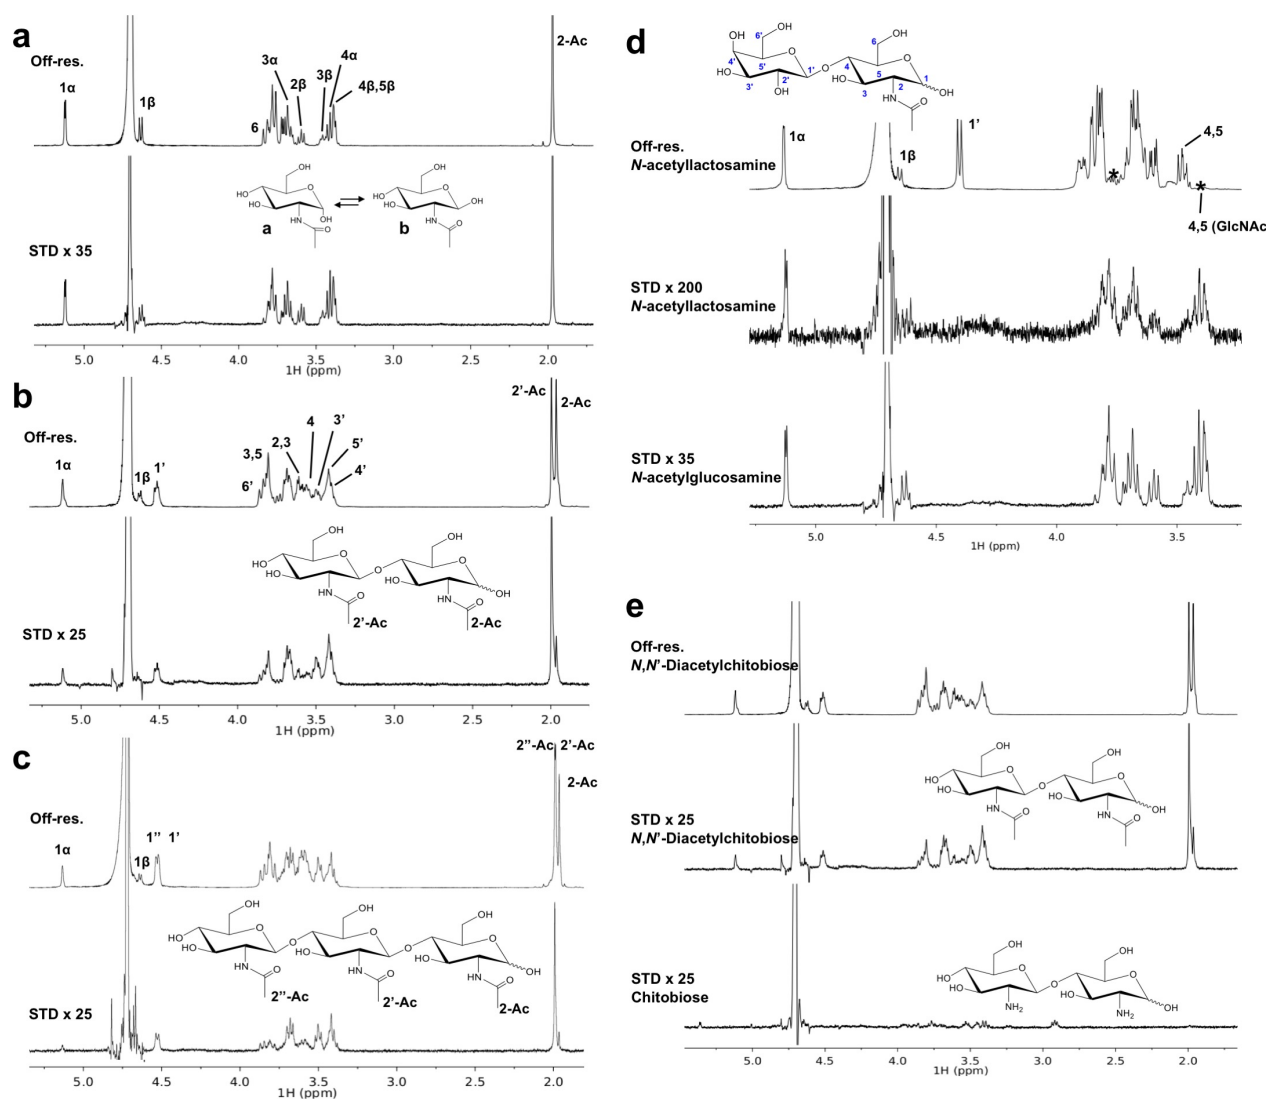

68  
69

70 **Fig. S5.** A. *N*-acetyl-glucosamine binding to MAdV-2-fib(586-787) studied by STD-NMR. Top: Off-  
 71 resonance spectrum, with labels indicating the assignment for representative ligand signals. Bottom:  
 72 STD spectrum (up-scaled 35×). B. *N,N'*-diacetylchitobiose (GlcNAc-β-(1→4)-GlcNAc) binding of  
 73 MAdV-2-fib(586-787). Top: Off-resonance spectrum, with labels indicating the assignment for  
 74 representative ligand signals. Bottom: STD spectrum (up-scaled 25×). C. Binding of *N,N',N''*-  
 75 triacetylchitotriose (GlcNAc-β-(1→4)-GlcNAc-β-(1→4)-GlcNAc) to MAdV-2-fib(586-787). Top  
 76 spectrum: Off-resonance (reference) spectrum. Bottom spectrum: STD spectra up-scaled 25×. D.  
 77 Effect of deacetylation on the binding of *N,N'*-diacetylchitobiose to MAdV-2-fib(586-787). Top  
 78 spectrum: Off-resonance spectrum of *N,N'*-diacetylchitobiose. Middle spectrum: STD spectrum of  
 79 *N,N'*-diacetylchitobiose. Bottom spectrum: STD spectrum of chitobiose. E. STD-NMR experiment  
 80 performed on *N*-acetyllactosamine (Gal-β-(1→4)-GlcNAc), showing that the only species being  
 81 recognised in the sample are trace amounts of GlcNAc. Top spectrum: Off-resonance spectrum of *N*-  
 82 acetyllactosamine; middle spectrum: STD spectrum of the *N*-acetyllactosamine sample; bottom  
 83 spectrum: STD spectrum of GlcNAc.  
 84

85 **a**

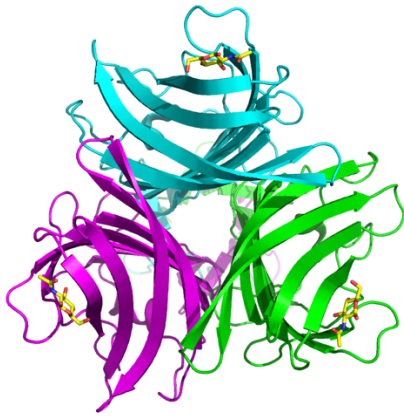

**b**

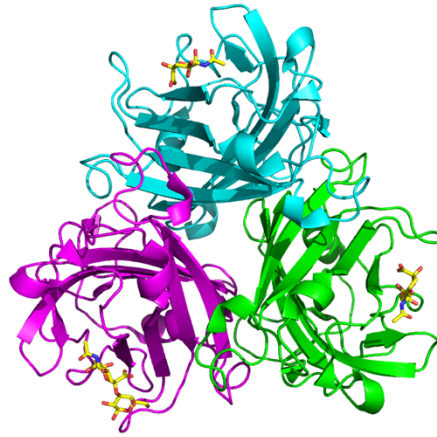

86  
87 **c**

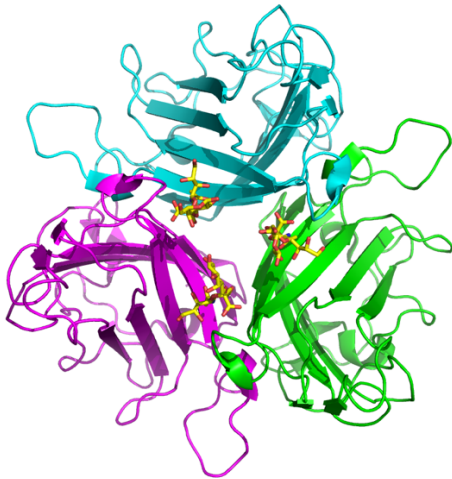

**d**

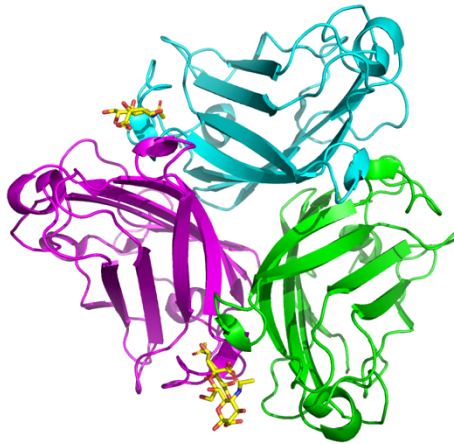

88  
89 **Fig. S6.** Comparison of the ligand binding sites of MAdV-2 fibre head bound to GlcNAc (PDB entry  
90 5NC1; panel A), CAdV-2 fibre head bound to sialyllactose (PDB entry 2WBV; panel B), HAdV37  
91 fibre head bound to sialyllactose (PDB entry 1UXA; panel C) and HAdV-52 fibre head bound to  
92 trisialic acid (PDB entry 6G47; panel D). Top views with the trimers in comparable orientations are  
93 shown, i.e. from the viral-distal end of the fibre.  
94

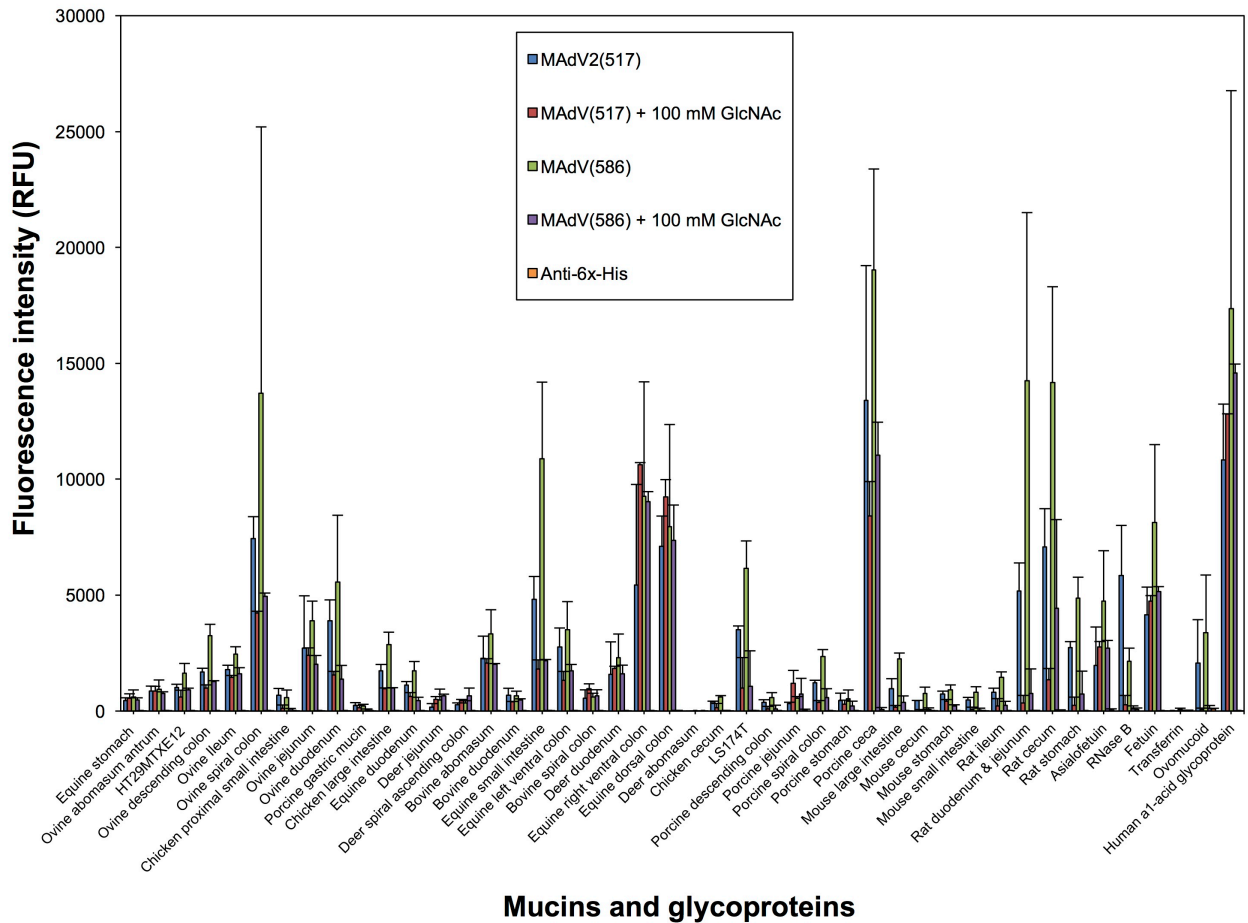

95

96 **Fig. S7.** MAdV-2 fibre binding to gastrointestinal tract mucins. Bar chart representing the binding  
 97 intensity of the MAdV-2fib(586-787) and MAdV-2fib(517-787) fibre proteins to mucins and  
 98 glycoproteins on a mucin microarray in the presence and absence of 100 mM GlcNAc. Binding was  
 99 detected using a fluorescently labelled anti-His antibody. The data for the uninhibited proteins  
 100 represents the mean of three technical replicate microarray slides and the data for the inhibited  
 101 proteins represent the mean of two technical replicates. Error bars represent one standard deviation  
 102 of the mean.
